# Supplementary material for: Bismaleimide bridged silsesquioxane aerogels with excellent heat resistance: effect of sol–gel solvent polarity
Source: Royal Society of Chemistry journal article supplement (doi:10.1039/d0sm00029a), 2020-01-01
Supplement: d0sm00029a1.pdf [file d0sm00029a1.pdf]

## Supplementary Materials for

### **Bismaleimide Bridged Silsesquioxane Aerogel with Excellent Heat**

#### **Resistance: Effect of Sol-Gel Solvent Polarity**

Juan Zhao <sup>a</sup>, Guanjie Zeng <sup>b</sup>, Fangxin Zou <sup>c</sup>, Shaohua Jiang <sup>a</sup>, Yeqing Chen <sup>d</sup>, Haiping Wang <sup>a</sup>, Chenzhong Mu <sup>e\*</sup> and Xiuzhi Tang <sup>f\*</sup>

<sup>a</sup> School of biotechnology and health sciences, Wuyi University, 529020, Guangdong, China

<sup>b</sup> School of Physics and Electronics, Central South University, 410083, Changsha, China.

<sup>c</sup> Center for Materials Forming-CEMEF, MINES Paris Tech, PSL Research University, UMR CNRS 76351, 06904 Sophia Antipolis, France.

<sup>d</sup> School of Material science and Technology, Wuyi University, 529020, Guangdong, China.

<sup>e</sup> State Key Laboratory of Special Functional Waterproof Materials, Beijing Oriental Yuhong Waterproof Technology Co., Ltd, 100123, Beijing, China.

<sup>f</sup> School of Aeronautics and Astronautics, Hunan Key Laboratory of Advanced Fibers and Composites, Central South University, 410083, Changsha, China.

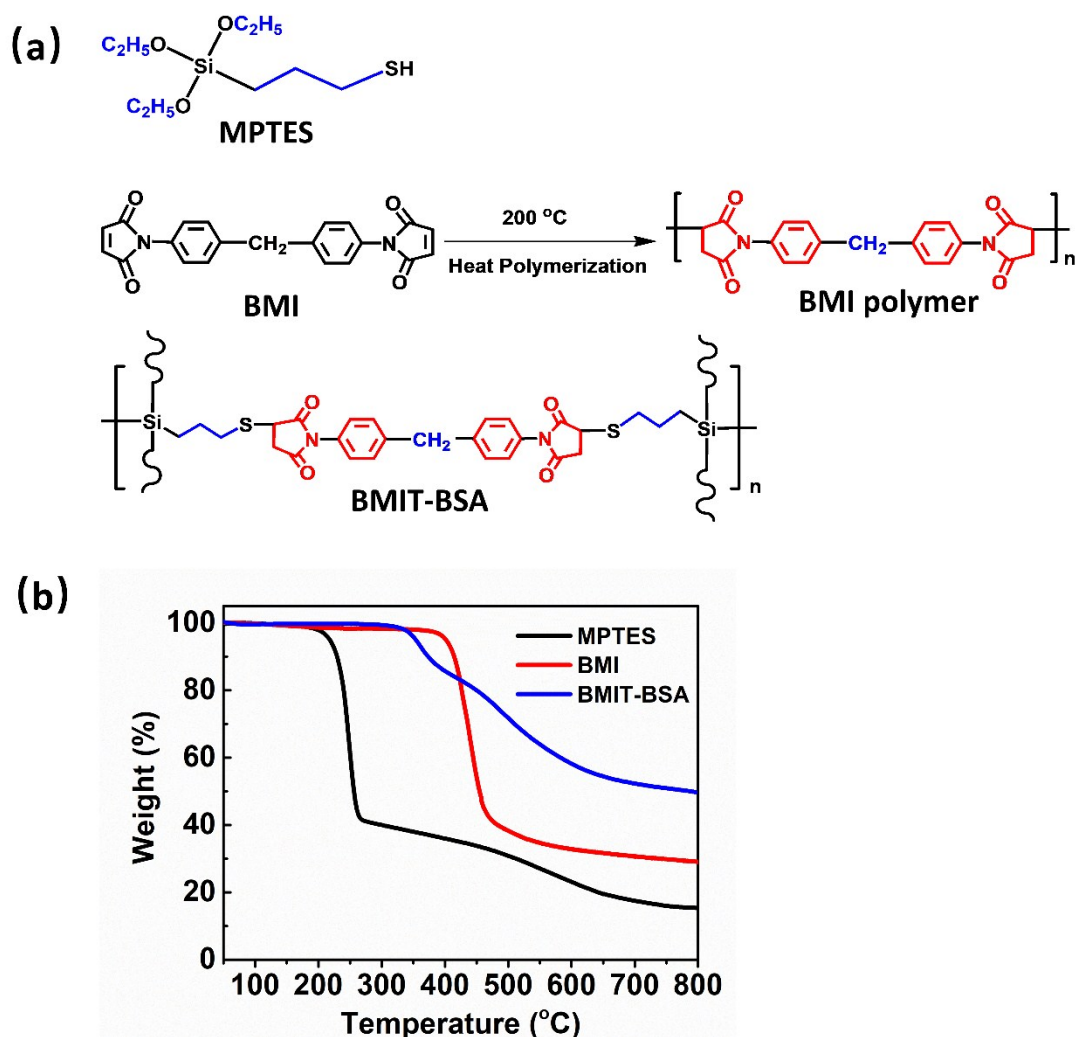

**Fig. S1** (a) Chemical structure of (3-mercaptopropyl) triethoxysilane (MPTES), N, N'-(4, 4'-diphenylmethylene) bismaleimide (BMI), BMI polymer and BMIT-BSA. (b) TG curves of MPTES, BMI and BMIT-BSA.

As shown in Fig. S1, (3-mercaptopropyl) triethoxysilane (MPTES) was initially decomposed at 210°C, due to thermally unstable aliphatic chain (Fig. S1a, colored in blue) in its structure <sup>[1]</sup>. When heating BMI from room temperature to 800 °C, BMI would be self-polymerized at about 200 °C and transformed into BMI <sup>[2]</sup>. The initial thermal decomposition of BMI was 400°C due to the existence of benzene ring and imide ring (Fig. S1a, colored in red) <sup>[3]</sup>. Thus, when bismaleimide structure was introduced into BMIT-BSAs, the polymeric network contains aliphatic chains (Fig. S1a, colored in blue), benzene rings and imide rings (Fig. S1a, colored in red). Although the aliphatic groups would shift the initial decomposition temperature ( $T_{di}$ ) to low temperature, the rigid benzene ring and imide ring with higher steric hindrance and thermal stability would realize a higher  $T_{di}$  <sup>[4]</sup>. Owing to the combination of bismaleimide segments and aliphatic chains, BMIT-BSA was initially decomposed at 336 °C, demonstrating good thermal stability.

## References

- [1] W. Zhou, H. Yang, X. Guo and J. Lu, Polym. Degrad. Stabil., 2006, 91, 1471.
- [2] J. L. Hopewell, D. J. T. Hill and P. J. Pomery, Polymer, 1998, 39, 5601.
- [3] J. Hao, L. Jiang and X. Cai, Polymer, 1996, 37, 3721.
- [4] Z. Jiang, L. Yuan, G. Liang and A. Gu, Polym. Degrad. Stabil., 2015, 121, 30.
